# Supplementary material for: A new route to 3-acyl-2-aminobenzofurans: palladium-catalysed cycloisomerisation of 2-(cyanomethyl)phenyl esters
Source: Royal Society of Chemistry journal article supplement (doi:10.1039/b904127c), 2009-01-01
Supplement: b904127c.pdf [file b904127c.pdf]

## Supporting Information

# A New Entry to 3-Acyl-2-aminobenzofurans: Palladium-Catalysed Cycloisomerisation of 2-(Cyanomethyl)phenyl Esters

Masahito Murai, Koji Miki, and Kouichi Ohe

*Department of Energy and Hydrocarbon Chemistry, Graduate School of Engineering,  
Kyoto University, Katsura, Nishikyo-ku, Kyoto 615-8510, Japan*

e-mail: [ohc@scl.kyoto-u.ac.jp](mailto:ohc@scl.kyoto-u.ac.jp)

### Table of Contents

|                                                                          |     |
|--------------------------------------------------------------------------|-----|
| General Methods                                                          | S2  |
| Preparation of 2-(Cyanomethyl)phenyl Esters                              | S2  |
| General Procedure of Palladium-Catalyzed Cycloisomerisation Reactions    | S7  |
| Synthesis of Elbfluorene                                                 | S12 |
| References                                                               | S14 |
| <sup>1</sup> H NMR and <sup>13</sup> C-NMR Spectra of Selected Compounds | S15 |
| X-ray Crystallographic Studies of <b>2a</b> .                            | S23 |

**General Method.** Unless otherwise noted, chemicals obtained from commercial suppliers were used without further purification. Solvents were dried by the usual methods and distilled before use. Zn powder was purified according to known methods prior to use.<sup>1</sup> All reactions were carried out under nitrogen atmosphere. NMR spectra were measured for solutions in CDCl<sub>3</sub> or acetone-d<sub>6</sub> with tetramethylsilane as an internal standard (<sup>1</sup>H and <sup>13</sup>C): the following abbreviations are used; br: broad, s: singlet, d: doublet, t: triplet, q: quartet, m: multiplet. IR spectra were recorded with an FT-IR spectrometer. Melting points (mp) are uncorrected. Element analyses were performed at Microanalytical Center of Kyoto University. High-resolution mass spectra (HRMS) was measured with JEOL JMX-SX 102A spectrometer.

### Preparation of 2-(Cyanomethyl)phenyl Esters 1

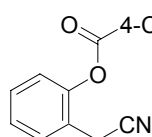

**2-(Cyanomethyl)phenyl 4'-trifluoromethylbenzoate (1a):** To a solution of 2-(cyanomethyl)phenol (666 mg, 5.0 mmol),<sup>2</sup> triethylamine (1.04 mL, 7.5 mmol), and 4-*N,N*-dimethylaminopyridine (6.1 mg, 0.05 mmol) in CH<sub>2</sub>Cl<sub>2</sub> (20 mL) was added 4-trifluoromethylbenzoyl chloride (1.56 g, 7.5 mmol) at 0 °C and the mixture was stirred at room temperature for 3 h. The reaction mixture was poured into brine (20 mL), and extracted with Et<sub>2</sub>O (20 mL x 3). The combined organic layer was dried over MgSO<sub>4</sub>. The organic solvent was removed under reduced pressure and the residue was subjected to flash column chromatography on silica gel with hexane / AcOEt = 20/1 - 7/1 as eluents to afford 2-(cyanomethyl)phenyl 4'-trifluoromethylbenzoate **1a** (1.22 g, 4.0 mmol, 80% yield) as a white solid. mp 62.1-62.8 °C. IR (KBr): 751, 758, 771, 862, 1016, 1074, 1126, 1171, 1219, 1269, 1328, 1415, 1493, 1736 (C=O), 2259 (CN), 2945, 2981, 3062 cm<sup>-1</sup>. <sup>1</sup>H NMR (400 MHz, CDCl<sub>3</sub>): δ 3.66 (s, 2H), 7.28 (d, *J* = 7.6 Hz, 1H), 7.30 (t, *J* = 7.6 Hz, 1H), 7.41 (t, *J* = 7.6 Hz, 1H), 7.47 (d, *J* = 7.6 Hz, 1H), 7.77 (d, *J* = 8.0 Hz, 2H), 8.32 (d, *J* = 8.0 Hz, 2H). <sup>13</sup>C NMR (100 MHz, CDCl<sub>3</sub>): δ 19.11, 116.7, 122.4, 122.5, 123.3 (q, *J* = 272.5 Hz), 125.6 (q, *J* = 3.3 Hz), 126.8, 129.5, 129.6, 130.5, 131.7, 135.1 (q, *J* = 32.3 Hz), 148.3, 163.0. Anal. calcd for C<sub>16</sub>H<sub>10</sub>F<sub>3</sub>NO<sub>2</sub>: C, 62.96; H, 3.30. found: C,

62.82; H, 3.41.

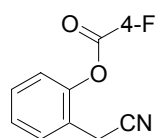

**2-(Cyanomethyl)phenyl 4'-fluorobenzoate (1b):** A white solid. mp 31.8-32.2 °C. IR (KBr): 756, 779, 853, 1011, 1061, 1096, 1150, 1170, 1198, 1217, 1267, 1413, 1456, 1504, 1603, 1733 (C=O), 2262 (CN), 2943, 2973 cm<sup>-1</sup>. <sup>1</sup>H NMR (400 MHz, CDCl<sub>3</sub>): δ 3.65 (s, 2H), 7.17 (d, *J* = 8.8 Hz, 2H), 7.26 (d, *J* = 7.6 Hz, 1H), 7.28 (t, *J* = 7.6 Hz, 1H), 7.40 (t, *J* = 7.6 Hz, 1H), 7.46 (d, *J* = 7.6 Hz, 1H), 8.22 (d, *J* = 8.8 Hz, 2H). <sup>13</sup>C NMR (100 MHz, CDCl<sub>3</sub>): δ 19.04, 115.7, 115.9, 116.7, 122.5, 122.6, 124.7 (d, *J* = 3.3 Hz), 126.5, 129.4 (d, *J* = 8.2 Hz), 132.8 (d, *J* = 9.9 Hz), 148.4, 163.1, 166.1 (d, *J* = 255.9 Hz). Anal. calcd for C<sub>15</sub>H<sub>10</sub>FNO<sub>2</sub>: C, 70.58; H, 3.95. found: C, 70.60; H, 3.99.

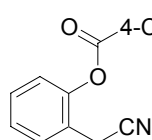

**2-(Cyanomethyl)phenyl 4'-chlorobenzoate (1c):** A white solid. mp 67.8-68.0 °C. IR (KBr): 759, 849, 955, 1012, 1095, 1170, 1220, 1275, 1401, 1456, 1492, 1594, 1722 (C=O), 2251 (CN), 2906, 2932 cm<sup>-1</sup>. <sup>1</sup>H NMR (400 MHz, CDCl<sub>3</sub>): δ 3.64 (s, 2H), 7.24 (d, *J* = 7.8 Hz, 1H), 7.28 (t, *J* = 7.3 Hz, 1H), 7.40 (t, *J* = 7.3 Hz, 1H), 7.46 (d, *J* = 7.8 Hz, 1H), 7.47 (d, *J* = 8.3 Hz, 2H), 8.13 (d, *J* = 8.3 Hz, 2H). <sup>13</sup>C NMR (100 MHz, CDCl<sub>3</sub>): δ 19.00, 116.7, 122.5, 122.6, 126.6, 126.9, 129.0, 129.5, 129.6, 131.5, 140.4, 148.4, 163.4. Anal. calcd for C<sub>15</sub>H<sub>10</sub>ClNO<sub>2</sub>: C, 66.31; H, 3.71. found: C, 66.11; H, 3.83.

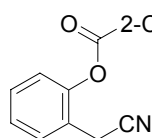

**2-(Cyanomethyl)phenyl 2'-chlorobenzoate (1d):** A white solid. mp 65.8-66.2 °C. IR (KBr): 756, 868, 947, 1032, 1099, 1172, 1220, 1243, 1401, 1456, 1492, 1594, 1722 (C=O), 2251 (CN), 2906, 2932 cm<sup>-1</sup>. <sup>1</sup>H NMR (400 MHz, CDCl<sub>3</sub>): δ 3.74 (s, 2H), 7.26-7.36 (m, 2H), 7.38-7.46 (m, 2H), 7.50-7.57 (m, 3H), 8.09 (d, *J* = 7.3 Hz, 1H). <sup>13</sup>C NMR (100 MHz, CDCl<sub>3</sub>): δ 19.28, 116.9, 122.6, 122.7, 126.8, 126.9, 128.4, 129.6, 129.7, 131.5, 132.1, 133.7, 134.5, 148.5, 163.3. Anal. calcd for C<sub>15</sub>H<sub>10</sub>ClNO<sub>2</sub>: C, 66.31; H, 3.71. found: C, 66.29; H, 3.58.

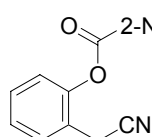

**2-(Cyanomethyl)phenyl 2'-naphthoate (1e):** A colorless oil. IR (neat): 761, 775, 825, 951, 1059, 1098, 1128, 1172, 1190, 1218, 1281, 1415, 1456, 1492, 1630, 1735 (C=O), 2251 (CN), 2942, 2968  $\text{cm}^{-1}$ .  $^1\text{H}$  NMR (400 MHz,  $\text{CDCl}_3$ ):

$\delta$ 3.70 (s, 2H), 7.28-7.32 (m, 2H), 7.42 (d,  $J = 7.6$  Hz, 1H), 7.50 (d,  $J = 7.6$  Hz, 1H), 7.56 (t,  $J = 7.6$  Hz, 1H), 7.62 (t,  $J = 7.6$  Hz, 1H), 7.89 (d,  $J = 8.4$  Hz, 1H), 7.93 (d,  $J = 8.4$  Hz, 1H), 7.98 (d,  $J = 8.4$  Hz, 1H), 8.18 (d,  $J = 8.4$  Hz, 1H), 8.81 (s, 1H).  $^{13}\text{C}$  NMR (100 MHz,  $\text{CDCl}_3$ ):  $\delta$ 19.13, 116.9, 122.7, 122.8, 125.2, 125.7, 126.6, 126.9, 127.8, 128.6, 128.9, 129.4, 129.5, 129.6, 132.2, 132.4, 135.9, 148.7, 164.5. Anal. calcd for  $\text{C}_{19}\text{H}_{13}\text{NO}_2$ : C, 79.28; H, 4.67. found: C, 79.43; H, 4.56.

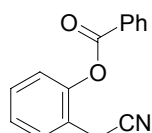

**2-(Cyanomethyl)phenyl benzoate (1f):** A white solid. mp 39.8-40.1  $^{\circ}\text{C}$ . IR (KBr): 751, 842, 1024, 1064, 1078, 1105, 1172, 1223, 1268, 1417, 1452, 1494, 1600, 1733 (C=O), 2255 (CN), 2963, 2975, 3061  $\text{cm}^{-1}$ .  $^1\text{H}$  NMR (400 MHz,  $\text{CDCl}_3$ ):

$\delta$ 3.65 (s, 2H), 7.23 (d,  $J = 8.0$  Hz, 1H), 7.28 (t,  $J = 7.2$  Hz, 1H), 7.39 (t,  $J = 8.0$  Hz, 1H), 7.49 (t,  $J = 8.0$  Hz, 2H), 7.52 (d,  $J = 8.0$  Hz, 1H), 7.64 (t,  $J = 8.0$  Hz, 1H), 8.21 (d,  $J = 7.2$  Hz, 2H).  $^{13}\text{C}$  NMR (100 MHz,  $\text{CDCl}_3$ ):  $\delta$ 19.05, 116.8, 122.6, 122.7, 126.5, 128.4, 128.6, 129.3, 129.4, 130.4, 133.9, 148.5, 164.1. Anal. calcd for  $\text{C}_{15}\text{H}_{11}\text{NO}_2$ : C, 75.94; H, 4.67. found: C, 76.18; H, 4.71.

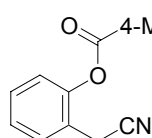

**2-(Cyanomethyl)phenyl 4'-methylbenzoate (1g):** A white solid. mp 44.8-45.3  $^{\circ}\text{C}$ . IR (KBr): 744, 837, 1019, 1072, 1103, 1170, 1221, 1269, 1417, 1457, 1493, 1610, 1735 (C=O), 2255 (CN), 2926, 2938  $\text{cm}^{-1}$ .  $^1\text{H}$  NMR (400

MHz,  $\text{CDCl}_3$ ):  $\delta$ 2.44 (s, 3H), 3.65 (s, 2H), 7.22-7.28 (m, 2H), 7.31 (d,  $J = 8.0$  Hz, 2H), 7.41 (t,  $J = 7.6$  Hz, 1H), 7.48 (t,  $J = 7.6$  Hz, 1H), 8.10 (d,  $J = 8.0$  Hz, 2H).  $^{13}\text{C}$  NMR (100 MHz,  $\text{CDCl}_3$ ):  $\delta$ 18.98, 21.63, 116.9, 122.7, 122.8, 125.7, 126.4, 129.2, 129.3, 129.4, 130.2, 144.9, 148.7, 164.3. Anal. calcd for  $\text{C}_{16}\text{H}_{13}\text{NO}_2$ : C, 76.48; H, 5.21. found: C, 76.76; H, 5.21.

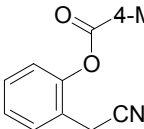 **2-(Cyanomethyl)phenyl 4'-methoxybenzoate (1h):** A white solid. mp 79.0-80.2 °C. IR (KBr): 753, 842, 1028, 1065, 1103, 1169, 1223, 1263, 1425, 1456, 1493, 1513, 1607, 1722 (C=O), 2245 (CN), 2842, 2929, 2959 cm<sup>-1</sup>. <sup>1</sup>H NMR (400 MHz, CDCl<sub>3</sub>): δ 3.67 (s, 2H), 3.89 (s, 3H), 7.00 (d, *J* = 8.4 Hz, 2H), 7.25 (d, *J* = 7.6 Hz, 1H), 7.29 (t, *J* = 7.6 Hz, 1H), 7.41 (t, *J* = 7.6 Hz, 1H), 7.49 (d, *J* = 7.6 Hz, 1H), 8.17 (d, *J* = 8.4 Hz, 2H). <sup>13</sup>C NMR (100 MHz, CDCl<sub>3</sub>): δ 19.09, 55.49, 114.0, 117.0, 120.7, 122.8, 122.9, 126.5, 129.4, 129.5, 132.4, 148.8, 164.0, 164.2. Anal. calcd for C<sub>16</sub>H<sub>13</sub>NO<sub>2</sub>: C, 71.90; H, 4.90. found: C, 71.63; H, 4.89.

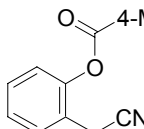 **2-(Cyanomethyl)phenyl 4'-(*N,N*-dimethylamino)benzoate (1i):** A pale yellow solid. mp 139.2-140.6 °C. IR (KBr): 761, 824, 1053, 1096, 1165, 1184, 1223, 1282, 1383, 1454, 1487, 1537, 1604, 1701 (C=O), 2247 (CN), 2826, 2925, 2960 cm<sup>-1</sup>. <sup>1</sup>H NMR (400 MHz, CDCl<sub>3</sub>): δ 3.06 (s, 6H), 3.66 (s, 2H), 6.69 (d, *J* = 9.2 Hz, 2H), 7.23 (d, *J* = 8.0 Hz, 1H), 7.26 (t, *J* = 8.0 Hz, 1H), 7.38 (t, *J* = 8.0 Hz, 1H), 7.48 (d, *J* = 8.0 Hz, 1H), 8.06 (d, *J* = 9.2 Hz, 2H). <sup>13</sup>C NMR (100 MHz, CDCl<sub>3</sub>): δ 19.07, 39.94, 110.7, 114.5, 117.1, 122.8, 122.9, 126.0, 129.1, 129.2, 132.0, 148.9, 153.8, 164.4. Anal. calcd for C<sub>17</sub>H<sub>16</sub>N<sub>2</sub>O<sub>2</sub>: C, 72.84; H, 5.75. found: C, 72.54; H, 5.86.

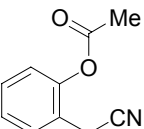 **2-(Cyanomethyl)phenyl acetate (1j):** A colorless oil. IR (neat): 753, 792, 830, 1011, 1095, 1171, 1202, 1370, 1417, 1456, 1492, 1588, 1768 (C=O), 2250 (CN), 2928, 2980, 3067 cm<sup>-1</sup>. <sup>1</sup>H NMR (400 MHz, CDCl<sub>3</sub>): δ 2.32 (s, 3H), 3.61 (s, 2H), 7.11 (d, *J* = 7.9 Hz, 1H), 7.25 (t, *J* = 7.9 Hz, 1H), 7.34 (t, *J* = 7.9 Hz, 1H), 7.40 (d, *J* = 7.9 Hz, 1H). <sup>13</sup>C NMR (100 MHz, CDCl<sub>3</sub>): δ 18.89, 20.63, 116.7, 122.2, 122.5, 126.2, 129.2, 129.3, 148.2, 168.4. Anal. calcd for C<sub>13</sub>H<sub>9</sub>NO<sub>2</sub>: C, 68.56; H, 5.18. found: C, 68.39; H, 5.19.

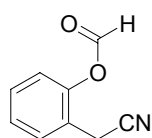

**2-(Cyanomethyl)phenyl formate (1k):** A colorless oil. IR (neat): 760, 830, 1085, 1116, 1172, 1215, 1415, 1457, 1493, 1589, 1740 (C=O), 2252 (CN), 2968, 3068  $\text{cm}^{-1}$ .  $^1\text{H}$  NMR (400 MHz,  $\text{CDCl}_3$ ):  $\delta$  3.66 (s, 2H), 7.18 (d,  $J = 7.8$  Hz, 1H), 7.29 (t,  $J = 7.8$  Hz, 1H), 7.38 (t,  $J = 7.8$  Hz, 1H), 7.47 (d,  $J = 7.8$  Hz, 1H), 8.31 (s, 1H).  $^{13}\text{C}$  NMR (100 MHz,  $\text{CDCl}_3$ ):  $\delta$  18.79, 116.7, 122.0, 122.1, 126.9, 129.5, 129.7, 147.4, 158.2. Anal. calcd for  $\text{C}_9\text{H}_7\text{NO}_2$ : C, 67.07; H, 4.38. found: C, 67.32; H, 4.64.

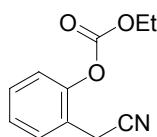

**2-(Cyanomethyl)phenyl ethyl carbonate (1l):** A colorless oil. IR (neat): 775, 897, 996, 1056, 1176, 1226, 1258, 1457, 1494, 1589, 1767 (C=O), 2251 (CN), 2986, 3068  $\text{cm}^{-1}$ .  $^1\text{H}$  NMR (400 MHz,  $\text{CDCl}_3$ ):  $\delta$  1.38 (t,  $J = 7.31$  Hz, 3H), 3.70 (s, 2H), 4.32 (q,  $J = 7.3$  Hz, 2H), 7.28-7.30 (m, 2H), 7.36 (t,  $J = 7.8$  Hz, 1H), 7.45 (d,  $J = 7.8$  Hz, 1H).  $^{13}\text{C}$  NMR (100 MHz,  $\text{CDCl}_3$ ):  $\delta$  13.95, 18.61, 65.21, 116.7, 122.1, 122.2, 126.6, 129.3, 129.4, 148.6, 152.7. Anal. calcd for  $\text{C}_{11}\text{H}_{11}\text{NO}_3$ : C, 64.38; H, 5.40. found: C, 64.34; H, 5.43.

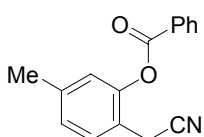

**2-(Cyanomethyl)-5-methylphenyl benzoate (1m):** A white solid. mp 74.0-74.6  $^{\circ}\text{C}$ . IR (neat): 712, 815, 892, 946, 1023, 1065, 1104, 1153, 1174, 1238, 1256, 1315, 1413, 1451, 1508, 1581, 1600, 1622, 1725 (C=O), 2247 (CN), 2857, 2920, 2970, 3032  $\text{cm}^{-1}$ .  $^1\text{H}$  NMR (400 MHz,  $\text{CDCl}_3$ ):  $\delta$  2.33 (s, 3H), 3.56 (s, 2H), 7.04 (s, 1H), 7.05 (d,  $J = 7.3$  Hz, 1H), 7.30 (d,  $J = 7.3$  Hz, 1H), 7.47 (t,  $J = 7.3$  Hz, 2H), 7.60 (t,  $J = 7.3$  Hz, 1H), 8.19 (d,  $J = 7.3$  Hz, 2H).  $^{13}\text{C}$  NMR (100 MHz,  $\text{CDCl}_3$ ):  $\delta$  18.41, 20.72, 116.9, 119.4, 123.0, 127.1, 128.5, 129.0, 129.9, 130.0, 133.7, 139.6, 148.3, 164.1. Anal. calcd for  $\text{C}_{16}\text{H}_{13}\text{NO}_2$ : C, 76.48; H, 5.21. found: C, 76.52; H, 5.32.

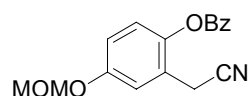

**2-(cyanomethyl)-4-(methoxymethoxy)phenyl benzoate (1n):** A pale yellow oil. IR (neat): 709, 804, 872, 923, 1010, 1059, 1077, 1102, 1153, 1188, 1265, 1315, 1452, 1499, 1602, 1739 (C=O), 2251 (CN), 2828, 2957, 3070  $\text{cm}^{-1}$ .  $^1\text{H}$  NMR (400 MHz,

CDCl<sub>3</sub>):  $\delta$ 3.49 (s, 3H), 3.64 (s, 2H), 5.18 (s, 2H), 7.08 (d,  $J = 8.3$  Hz, 1H), 7.17 (s, 1H), 7.18 (d,  $J = 8.3$  Hz, 1H), 7.53 (t,  $J = 7.3$  Hz, 2H), 7.66 (t,  $J = 7.3$  Hz, 1H), 8.21 (d,  $J = 7.3$  Hz, 2H). <sup>13</sup>C NMR (100 MHz, CDCl<sub>3</sub>):  $\delta$ 19.26, 56.04, 94.68, 116.7, 117.0, 117.3, 123.6, 128.6, 128.7, 130.2, 130.3, 134.0, 143.0, 155.3, 164.7. Anal. calcd for C<sub>17</sub>H<sub>15</sub>NO<sub>4</sub>: C, 68.68; H, 5.09. found: C, 68.52; H, 5.16.

**General Procedure of Palladium-Catalysed Cycloisomerisation Reactions.** A flame dried Schlenk flask was charged with Pd(OAc)<sub>2</sub> (6.7 mg, 0.030 mmol), PCy<sub>3</sub> (16.9 mg, 0.060 mmol), zinc powder (19.6 mg, 0.30 mmol), MS4A (30 mg), and DMF (1.2 mL). After stirring at room temperature for 20 min, 2-(cyanomethyl)phenyl ester **1** (0.30 mmol) was added and the resulting mixture was stirred at 100 °C. After the time specified in Tables 1-2, the mixture was diluted with Et<sub>2</sub>O and filtered through a short silica gel pad. The filtrate was washed with brine, and the aqueous layer was extracted with Et<sub>2</sub>O (10 mL x 3). The combined organic layer was dried over MgSO<sub>4</sub>, then filtered. The organic solvent was removed under reduced pressure and the residue was subjected to flash column chromatography on silica gel with hexane / AcOEt = 7/1 - 2/1 as eluents to afford the corresponding 3-acyl-2-aminobenzofuran **2**.

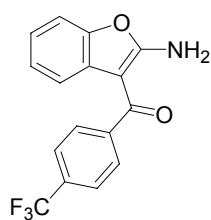

**2-Amino-3-(4'-trifluoromethylbenzoyl)benzo[b]furan (2a):** A yellow solid.

mp 117.8~119.5 °C. IR (KBr): 745, 784, 854, 918, 978, 1018, 1067, 1123, 1177, 1240, 1298, 1327, 1480, 1515, 1593, 1650 (C=O), 2940, 3120, 3161, 3369 cm<sup>-1</sup>.

<sup>1</sup>H NMR (400 MHz, CDCl<sub>3</sub>):  $\delta$ 6.76 (d,  $J = 7.2$  Hz, 1H), 7.00 (t,  $J = 7.6$  Hz, 1H), 7.05 (t,  $J = 7.6$  Hz, 1H), 7.20 (d,  $J = 7.2$  Hz, 1H), 7.38 (br, 2H), 7.74 (d,  $J = 8.4$  Hz, 2H), 7.80 (d,  $J = 8.4$  Hz, 2H). <sup>13</sup>C NMR (100 MHz, CDCl<sub>3</sub>):  $\delta$ 94.23, 110.1, 118.5, 122.2, 123.8 (q,  $J = 271.7$  Hz), 123.9, 125.4 (q,  $J = 3.3$  Hz), 125.6, 127.7, 132.2 (q,  $J = 32.2$  Hz), 144.0, 149.2, 166.9, 188.8. Anal. calcd for C<sub>16</sub>H<sub>10</sub>F<sub>3</sub>NO<sub>2</sub>: C, 62.96; H, 3.30. found: C, 63.09; H, 3.22.

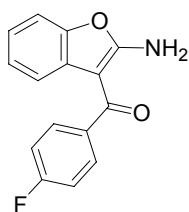

**2-Amino-3-(4'-fluorobenzoyl)benzo[b]furan (2b):** A pale yellow solid. mp 107.2-108.4 °C. IR (KBr): 745, 781, 849, 916, 977, 1021, 1095, 1153, 1177, 1240, 1298, 1336, 1478, 1509, 1599, 1644 (C=O), 2930, 3119, 3164, 3368 cm<sup>-1</sup>. <sup>1</sup>H NMR (400 MHz, CDCl<sub>3</sub>): δ 6.91 (d, *J* = 6.8 Hz, 1H), 7.00-7.07 (m, 2H), 7.11-7.19 (m, 4H), 7.23 (d, *J* = 6.8 Hz, 1H), 7.73 (d, *J* = 8.0 Hz, 2H). <sup>13</sup>C NMR (100 MHz, CDCl<sub>3</sub>): δ 94.24, 110.1, 115.3 (d, *J* = 22.4 Hz), 118.7, 121.9, 123.7, 126.1, 129.9 (d, *J* = 8.3 Hz), 136.9 (d, *J* = 3.3 Hz), 149.1, 164.2 (d, *J* = 250.1 Hz), 166.5, 189.3. Anal. calcd for C<sub>15</sub>H<sub>10</sub>FNO<sub>2</sub>: C, 70.58; H, 3.95. found: C, 70.67; H, 3.91.

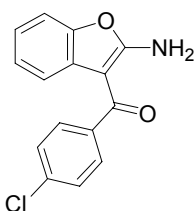

**2-Amino-3-(4'-chlorobenzoyl)benzo[b]furan (2c):** A yellow solid. mp 122.1-122.7 °C. IR (KBr): 750, 777, 840, 917, 975, 1016, 1095, 1173, 1241, 1337, 1437, 1477, 1591, 1614, 1642 (C=O), 3169, 3393 cm<sup>-1</sup>. <sup>1</sup>H NMR (400 MHz, CDCl<sub>3</sub>): δ 6.90 (d, *J* = 7.3 Hz, 1H), 7.03 (t, *J* = 7.8 Hz, 1H), 7.04 (t, *J* = 7.8 Hz, 1H), 7.09 (br, 2H), 7.23 (d, *J* = 7.3 Hz, 1H), 7.46 (d, *J* = 8.3 Hz, 2H), 7.66 (d, *J* = 8.3 Hz, 2H). <sup>13</sup>C NMR (100 MHz, CDCl<sub>3</sub>): δ 94.23, 110.2, 118.8, 122.1, 123.9, 128.6, 129.1, 130.9, 137.0, 139.2, 149.2, 166.7, 189.2. Anal. calcd for C<sub>15</sub>H<sub>10</sub>ClNO<sub>2</sub>: C, 66.31; H, 3.71. found: C, 66.34; H, 3.53.

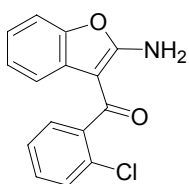

**2-Amino-3-(2'-chlorobenzoyl)benzo[b]furan (2d):** A yellow solid. mp 120.7-121.8 °C. IR (KBr): 741, 761, 851, 920, 979, 1018, 1098, 1181, 1238, 1338, 1442, 1495, 1594, 1614, 1656 (C=O), 3114, 3246, 3380 cm<sup>-1</sup>. <sup>1</sup>H NMR (400 MHz, CDCl<sub>3</sub>): δ 6.26 (d, *J* = 7.3 Hz, 1H), 6.94 (t, *J* = 7.3 Hz, 1H), 7.01 (t, *J* = 7.3 Hz, 1H), 7.20 (d, *J* = 7.3 Hz, 2H), 7.37 (br, 2H), 7.42 (m, 2H), 7.50 (d, *J* = 7.3 Hz, 1H). <sup>13</sup>C NMR (100 MHz, CDCl<sub>3</sub>): δ 95.28, 110.0, 117.9, 122.0, 124.1, 125.8, 127.1, 127.7, 130.0, 130.3, 130.5, 140.5, 149.3, 166.3, 188.0. Anal. calcd for C<sub>15</sub>H<sub>10</sub>ClNO<sub>2</sub>: C, 66.31; H, 3.71. found: C, 66.38; H, 3.60.



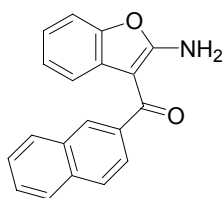

**2-Amino-3-(2'-naphthoyl)benzo[b]furan (2e):** A yellow solid. mp 47.8-49.2 °C. IR (KBr): 744, 783, 812, 915, 976, 1018, 1099 1177, 1229, 1298, 1334, 1481, 1507, 1597, 1614 1647 (C=O), 2951, 3054, 3194, 3360 cm<sup>-1</sup>. <sup>1</sup>H NMR (400 MHz, CDCl<sub>3</sub>): δ6.85-6.94 (m, 2H), 6.95 (t, *J* = 6.8 Hz, 1H), 7.11 (d, *J* = 7.6 Hz, 1H), 7.43 (br, 2H), 7.45-7.55 (m, 2H), 7.84 (d, *J* = 8.0 Hz, 1H), 7.86 (t, *J* = 6.8 Hz, 2H), 7.92 (d, *J* = 8.0 Hz, 1H), 8.22 (s, 1H). <sup>13</sup>C NMR (100 MHz, CDCl<sub>3</sub>): δ94.37, 109.9, 118.8, 121.7, 123.6, 124.5, 126.2, 126.4, 127.2, 127.6, 127.7, 128.1, 128.7, 132.4, 134.4, 137.9, 149.0, 166.7, 190.3 Anal. calcd for C<sub>19</sub>H<sub>13</sub>NO<sub>2</sub>: C, 79.43; H, 4.56. found: C, 79.44; H, 4.64.

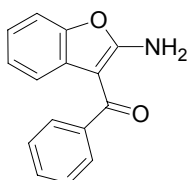

**2-Amino-3-benzoylbenzo[b]furan (2f):** A yellow solid. mp 138.9-140.3 °C. IR (KBr): 749, 762, 794, 906, 930, 974, 1017, 1104, 1173, 1185, 1243, 1300, 1338, 1437, 1481, 1596, 1618, 1645 (C=O), 2938, 3054, 3153, 3207, 3410 cm<sup>-1</sup>. <sup>1</sup>H NMR (400 MHz, CDCl<sub>3</sub>): δ6.85 (d, *J* = 7.2 Hz, 1H), 6.95-7.02 (m, 2H), 7.18 (d, *J* = 7.2 Hz, 1H), 7.33 (br, 2H), 7.45-7.53 (m, 3H), 7.75 (d, *J* = 6.4 Hz, 2H). <sup>13</sup>C NMR (100 MHz, CDCl<sub>3</sub>): δ94.60, 109.8, 118.7, 121.7, 123.5, 126.1, 127.2, 128.2, 130.6, 140.8, 149.0, 166.5, 191.0. Anal. calcd for C<sub>15</sub>H<sub>11</sub>NO<sub>2</sub>: C, 75.94; H, 4.67. found: C, 76.11; H, 4.66.

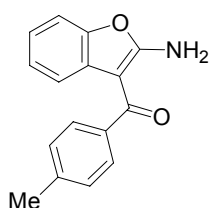

**2-Amino-3-(4'-methylbenzoyl)benzo[b]furan (2g):** A yellow solid. mp 108.6-109.2 °C. IR (KBr): 746, 776, 833, 914, 971, 1018, 1100, 1175, 1242, 1298, 1332, 1439, 1479, 1596, 1610, 1646 (C=O), 2946, 3190, 3205, 3364 cm<sup>-1</sup>. <sup>1</sup>H NMR (400 MHz, CDCl<sub>3</sub>): δ2.42 (s, 3H), 6.98 (d, *J* = 8.0 Hz, 1H), 6.97-7.03 (m, 2H), 7.17-7.19 (m, 1H), 7.21 (br, 2H), 7.26 (d, *J* = 7.6 Hz, 2H), 7.62 (d, *J* = 7.6 Hz, 2H). <sup>13</sup>C NMR (100 MHz, CDCl<sub>3</sub>): δ21.51, 94.22, 109.9, 119.0, 121.7, 123.6, 126.4, 127.6, 128.9, 138.0, 141.2, 149.1, 166.6, 190.7. Anal. calcd for C<sub>16</sub>H<sub>13</sub>NO<sub>2</sub>: C, 76.48; H, 5.21. found: C, 76.64; H, 5.20.

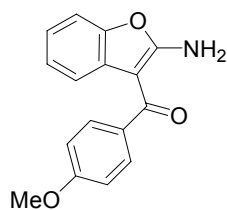

**2-Amino-3-(4'-methoxybenzoyl)benzo[b]furan (2h):** A yellow solid. mp 115.8-116.5 °C. IR (KBr): 743, 780, 844, 915, 975, 1025, 1103, 1170, 1185, 1245, 1299, 1337, 1437, 1482, 1589, 1605, 1647 (C=O), 2940, 3046, 3192, 3247, 3379 cm<sup>-1</sup>. <sup>1</sup>H NMR (400 MHz, CDCl<sub>3</sub>): δ 3.84 (s, 3H), 6.97 (d, *J* = 7.2 Hz, 1H), 6.95-7.02 (m, 4H), 7.18-7.21 (m, 1H), 7.27 (br, 2H), 7.74 (d, *J* = 7.2 Hz, 2H). <sup>13</sup>C NMR (100 MHz, CDCl<sub>3</sub>): δ 55.25, 94.54, 109.8, 113.3, 118.8, 121.5, 123.4, 126.4, 129.6, 133.3, 149.0, 161.6, 166.4, 190.1. Anal. calcd for C<sub>16</sub>H<sub>13</sub>NO<sub>3</sub>: C, 71.90; H, 4.90. found: C, 71.67; H, 4.90.

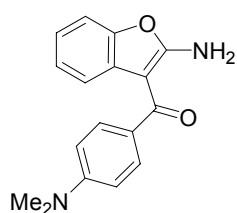

**2-Amino-3-(4'-*N,N*-dimethylaminobenzoyl)benzo[b]furan (2i):** A yellow solid. mp 54.2-55.8 °C. IR (KBr): 744, 780, 825, 914, 970, 1018, 1100, 1174, 1186, 1248, 1298, 1337, 1430, 1476, 1601, 1646 (C=O), 2952, 3195, 3218, 3385 cm<sup>-1</sup>. <sup>1</sup>H NMR (400 MHz, CDCl<sub>3</sub>): δ 3.05 (s, 6H), 6.71 (d, *J* = 7.2 Hz, 2H), 6.89 (br, 2H), 7.00-7.08 (m, 2H), 7.23-7.25 (m, 2H), 7.75 (d, *J* = 7.2 Hz, 2H). <sup>13</sup>C NMR (100 MHz, CDCl<sub>3</sub>): δ 40.08, 94.40, 109.8, 110.7, 119.3, 121.3, 123.4, 127.0, 128.0, 130.0, 149.1, 152.5, 166.0, 190.1. Anal. calcd for C<sub>17</sub>H<sub>16</sub>N<sub>2</sub>O<sub>2</sub>: C, 72.84; H, 5.75. found: C, 72.54; H, 5.75.

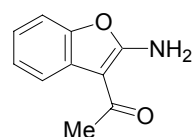

**3-Acetyl-2-aminobenzo[b]furan (2j):** A yellow solid. mp 171.2-172.3 °C. IR (KBr): 739, 753, 940, 1024, 1103, 1179, 1236, 1299, 1326, 1362, 1422, 1442, 1494, 1605, 1656 1676 (C=O), 2946, 3072, 3168, 3222, 3384 cm<sup>-1</sup>. <sup>1</sup>H NMR (400 MHz, CDCl<sub>3</sub>): δ 2.55 (s, 3H), 6.84 (br, 2H), 7.10 (t, *J* = 7.6 Hz, 1H), 7.25 (t, *J* = 7.6 Hz, 1H), 7.26 (d, *J* = 7.6 Hz, 1H), 7.48 (d, *J* = 7.6 Hz, 1H). <sup>13</sup>C NMR (100 MHz, CDCl<sub>3</sub>): δ 29.52, 95.21, 110.2, 118.3, 121.6, 124.1, 126.4, 149.1, 164.8, 192.7. Anal. calcd for C<sub>10</sub>H<sub>9</sub>NO<sub>2</sub>: C, 68.56; H, 5.18. found: C, 68.29; H, 5.02.

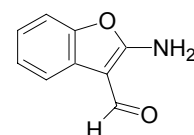

**2-Amino-3-formylbenzo[b]furan (2k)**<sup>3</sup>: A white solid. <sup>1</sup>H NMR (400 MHz, CDCl<sub>3</sub>): δ 6.78 (br, 2H), 6.93-7.33 (m, 3H), 7.68-7.71 (m, 1H), 9.91 (s, 1H).

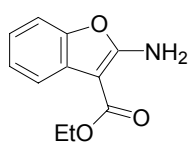

**2-Amino-3-ethoxycarbonylbenzo[b]furan (2l):** A white solid. mp 69.2-69.8 °C.

IR (KBr): 746, 785, 969, 1039, 1123, 1173, 1240, 1298, 1321, 1368, 1434, 1487, 1535, 1628, 1664 (C=O), 2931, 2984, 3149, 3274, 3414 cm<sup>-1</sup>. <sup>1</sup>H NMR (400

MHz, CDCl<sub>3</sub>): δ 1.42 (t, *J* = 7.3 Hz, 3H), 4.37 (q, *J* = 7.3 Hz, 2H), 6.03 (br, 2H), 7.05 (t, *J* = 7.8 Hz, 1H), 7.16-7.26 (m, 2H), 7.65 (d, *J* = 7.8 Hz, 1H). <sup>13</sup>C NMR (100 MHz, CDCl<sub>3</sub>): δ 14.53, 59.66, 84.61, 109.6, 119.3, 121.4, 124.0, 126.8, 149.1, 164.5, 166.2. Anal. calcd for C<sub>11</sub>H<sub>11</sub>NO<sub>3</sub>: C, 64.38; H, 5.40. found: C, 64.37; H, 5.49.

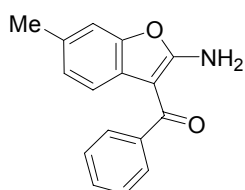

**2-Amino-3-benzoyl-6-methylbenzo[b]furan (2m):** A yellow solid. mp

123.1-123.9 °C. IR (KBr): 762, 807, 899, 937, 983, 1033, 1111, 1156, 1209, 1254, 1336, 1364, 1477, 1504, 1590, 1629, 1659 (C=O), 2859, 3177 cm<sup>-1</sup>. <sup>1</sup>H

NMR (400 MHz, CDCl<sub>3</sub>): δ 2.33 (s, 3H), 6.75 (d, *J* = 7.8 Hz, 1H), 6.80 (d, *J* = 7.8 Hz, 1H), 7.01 (s, 1H), 7.18 (br, 2H), 7.42-7.56 (m, 3H), 7.69 (d, *J* = 7.3 Hz, 2H). <sup>13</sup>C NMR (100 MHz, CDCl<sub>3</sub>): δ 21.15, 94.23, 110.5, 118.5, 123.5, 124.5, 127.4, 128.2, 130.7, 131.9, 140.9, 149.5, 166.5, 190.5. Anal. calcd for C<sub>16</sub>H<sub>13</sub>NO<sub>2</sub>: C, 76.48; H, 5.21. found: C, 76.52; H, 5.32.

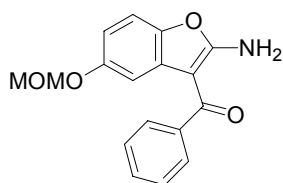

**2-Amino-3-benzoyl-4-(methoxymethoxy)benzo[b]furan (2n):** A yellow solid. mp 118.9-119.7 °C. IR (KBr): 756, 797, 920, 1023, 1079, 1152,

1175, 1246, 1342, 1480, 1593, 1651(C=O), 2942, 3111, 3325 cm<sup>-1</sup>. <sup>1</sup>H

NMR (400 MHz, CDCl<sub>3</sub>): δ 3.40 (s, 3H), 4.98 (s, 2H), 6.55 (d, *J* = 2.5 Hz, 1H), 6.74 (dd, *J* = 2.5, 8.8 Hz, 1H), 7.06 (br, 2H), 7.11 (d, *J* = 8.8 Hz, 1H), 7.49 (d, *J* = 6.8 Hz, 1H), 7.49-7.55 (m, 1H), 7.69 (d, *J* = 6.8 Hz, 1H). <sup>13</sup>C NMR (100 MHz, CDCl<sub>3</sub>): δ 55.78, 94.66, 95.38, 107.6, 110.2, 110.7, 127.2, 127.4, 128.3, 130.9, 140.7, 144.8, 154.0, 167.1, 190.7. Anal. calcd for C<sub>17</sub>H<sub>15</sub>NO<sub>4</sub>: C, 68.68; H, 5.09. found: C, 68.61; H, 5.11.

## Synthesis of Elbfluorene

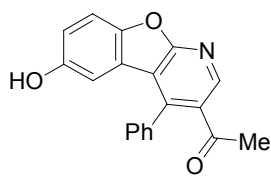

**Elbfluorene (8):** To a solution of 2-amino-3-benzoyl-4-(methoxymethoxy)-benzo[*b*]furan **2n** (595 mg, 2.0 mmol), diketene (0.19 mL, 2.4 mmol) in CH<sub>3</sub>CN (6.0 mL) were added dropwise a solution of trimethylchlorosilane (0.3 mL, 2.4 mmol) in CH<sub>3</sub>CN (6.0 mL) at 50 °C over 12 h. After being stirred additionally for 2 h, the reaction mixture was poured into sat. NaHCO<sub>3</sub> aqueous solution. The aqueous layer was extracted with Et<sub>2</sub>O (20 mL x 3). The combined organic layer was washed with brine and dried over MgSO<sub>4</sub>. The organic solvent was removed under reduced pressure to afford **4** (2:1 mixture of two tautomers) as a brown oil. <sup>1</sup>H NMR (400 MHz, CDCl<sub>3</sub>): δ 2.06 (s, 3H), 2.35 (s, 3H), 3.39 (s, 6H), 3.76 (s, 2H), 5.00 (s, 4H), 5.37 (s, 1H), 6.67-6.71 (m, 2H), 6.91-6.94 (m, 2H), 7.39-7.44 (m, 2H), 7.48-7.60 (m, 8H), 7.72-7.78 (m, 4H), 10.9 (s, 1H), 11.7 (s, 1H), 13.3 (s, 1H). <sup>13</sup>C NMR (100 MHz, CDCl<sub>3</sub>): δ 21.75, 30.80, 50.90, 55.75, 62.53, 91.65, 94.58, 95.18, 99.84, 101.0, 107.9, 108.0, 111.8, 111.9, 113.2, 113.5, 124.8, 124.9, 127.9, 128.2, 128.3, 128.4, 128.5, 130.0, 132.0, 132.2, 133.6, 139.0, 139.3, 146.0, 146.1, 154.3, 154.4, 156.9, 158.6, 162.9, 168.5, 178.8, 191.9, 192.2, 202.0. A solution of **4** in MeOH (4 mL) was added to sodium methoxide (130 mg, 2.4 mmol), and the resulting mixture was stirred at room temperature for 8 h, then quenched by adding excess of 10% NH<sub>4</sub>Cl aqueous solution. The aqueous layer was extracted with Et<sub>2</sub>O (20 mL x 3). The combined organic layer was washed with brine and dried over MgSO<sub>4</sub>. After the organic solvent was removed under reduced pressure, the resulting mixture diluted with CH<sub>2</sub>Cl<sub>2</sub> (8 mL) was slowly added to pyridine (0.19 mL, 2.4 mmol) and trifluoromethanesulfonic anhydride (0.40 mL, 2.4 mmol) at -78 °C. After stirring for 1 h at -78 °C, the resulting solution was gradually warmed up to room temperature and then stirred additionally for 1 h. The solution was washed with sat. NH<sub>4</sub>Cl aqueous solution, and the aqueous layer was extracted with Et<sub>2</sub>O (10 mL x 3). The combined organic layer was washed with brine and dried over MgSO<sub>4</sub>. The organic solvent was removed under reduced pressure and the residue was subjected to flash column chromatography on silica gel with hexane / AcOEt = 50/1 as eluents to afford **6** (555 mg, 1.12 mmol, 56% (three steps

from **2n**) as a pale yellow oil. IR (KBr): 704, 756, 916, 1002, 1074, 1149, 1194, 1251, 1378, 1474, 1557, 1585, 1700 (C=O), 2853, 2925, 3090  $\text{cm}^{-1}$ .  $^1\text{H}$  NMR (400 MHz,  $\text{CDCl}_3$ ):  $\delta$ 2.15 (s, 3H), 3.41 (s, 3H), 5.02 (s, 2H), 6.86 (d,  $J = 2.4$  Hz, 1H), 7.22-7.23 (m, 1H), 7.48-7.51 (m, 2H), 7.56 (d,  $J = 8.8$  Hz, 1H), 7.61-7.63 (m, 2H).  $^{13}\text{C}$  NMR (100 MHz,  $\text{CDCl}_3$ ):  $\delta$ 32.03, 55.92, 95.35, 109.8, 112.9, 115.9, 118.5 (q,  $J = 320.7$  Hz), 119.0, 121.7, 124.4, 128.5, 129.4, 130.3, 133.6, 147.1, 148.5, 151.0, 153.9, 160.3, 198.4. HRMS (FAB,  $[\text{M}+\text{H}]^+$ ): calcd for  $\text{C}_{22}\text{H}_{17}\text{F}_3\text{NO}_7\text{S}$ , 496.0678; found 496.0677. To a solution of **6** (248 mg, 0.50 mmol) in THF (2 mL) was added 10% HCl aqueous solution, and the mixture was stirred at 50  $^\circ\text{C}$  for 8 h. The reaction mixture was poured into sat.  $\text{NaHCO}_3$  aqueous solution, and then the aqueous layer was extracted with  $\text{Et}_2\text{O}$  (50 mL x 3). The combined organic layer was washed with brine and dried over  $\text{MgSO}_4$ . The organic solvent was removed under reduced pressure and the residue was subjected to flash column chromatography on silica gel with hexane / AcOEt = 10/1 as eluents to afford **7** (176 mg, 0.39 mmol, 78%) as a pale yellow solid. mp 203.4-204.8  $^\circ\text{C}$ . IR (KBr): 796, 812, 839, 903, 1023, 1134, 1168, 1218, 1293, 1375, 1421, 1497, 1588, 1699 (C=O), 3056, 3558  $\text{cm}^{-1}$ .  $^1\text{H}$  NMR (400 MHz,  $\text{CDCl}_3$ ):  $\delta$ 2.13 (s, 3H), 5.00 (br, 1H), 6.60 (d,  $J = 2.4$  Hz, 1H), 7.01 (dd,  $J = 2.4, 8.8$  Hz, 1H), 7.45-7.52 (m, 3H), 7.59-7.62 (m, 3H).  $^{13}\text{C}$  NMR (100 MHz,  $\text{d}_6$ -acetone):  $\delta$ 32.08, 108.3, 113.7, 117.1, 119.4 (q,  $J = 320.7$  Hz), 118.8, 122.6, 125.3, 129.5, 130.3, 131.0, 134.8, 148.3, 149.0, 150.4, 155.1, 161.0, 198.7. HRMS (FAB,  $[\text{M}+\text{H}]^+$ ): calcd for  $\text{C}_{20}\text{H}_{13}\text{F}_3\text{NO}_6\text{S}$ , 452.0416; found 452.0412. A flame dried Schlenk flask was charged with  $\text{Pd}(\text{OAc})_2$  (2.0 mg, 0.009 mmol), dppf (5.0 mg, 0.009 mmol), **7** (135.3 mg, 0.3 mmol), triethylsilane (0.07 mL, 0.45 mmol), and DMF (1.2 mL). After stirring at 70  $^\circ\text{C}$  for 3 h, the mixture was diluted with  $\text{Et}_2\text{O}$  and filtered through a short silica gel pad. The filtrate was washed with brine, and the aqueous layer was extracted with  $\text{Et}_2\text{O}$  (10 mL x 3). The combined organic layer was dried over  $\text{MgSO}_4$ , and then filtered. The organic solvent was removed under reduced pressure and the residue was subjected to flash column chromatography on silica gel with hexane / acetone = 10/1 as eluents to afford elbfluorene **8** (87 mg, 0.29 mmol, 96%) as a white solid. mp 234.8-235.6  $^\circ\text{C}$ . IR (KBr): 706, 738, 835, 910, 978, 1037, 1106, 1146, 1184,

1228, 1248, 1282, 1355, 1410, 1471, 1586, 1692 (C=O), 2873, 3146  $\text{cm}^{-1}$ .  $^1\text{H}$  NMR (400 MHz,  $\text{CDCl}_3$ ):  $\delta$ 2.12 (s, 3H), 4.98 (br, 1H), 6.48 (d,  $J = 2.4$  Hz, 1H), 7.00 (dd,  $J = 2.4, 8.8$  Hz, 1H), 7.43-7.47 (m, 2H), 7.50 (d,  $J = 8.8$  Hz, 1H), 7.58-7.62 (m, 3H), 8.75 (s, 1H).  $^{13}\text{C}$  NMR (100 MHz,  $\text{d}_6$ -acetone):  $\delta$ 30.67, 108.7, 113.2, 116.1, 118.0, 123.5, 129.3, 129.9, 130.0, 132.6, 137.1, 145.9, 147.8, 149.8, 154.6, 165.1, 200.0. HRMS (FAB,  $[\text{M}+\text{H}]^+$ ): calcd for  $\text{C}_{19}\text{H}_{14}\text{NO}_3$ , 304.0974; found 304.0966.

## References

- (1) Perrin, D. D.; Armarego, W. L. F. In *Purification of Laboratory Chemicals*, 4th ed.; Butterworth-Heinemann: Oxford, 1997.
- (2) Nakamura, S.; Uchiyama, M.; Ohwada, T. *J. Am. Chem. Soc.* **2003**, *125*, 5282.
- (3) Becher J.; Pluta, K.; Krake, N.; Brøndum, K.; Christensesn, N. J.; Vinader, M. V. *Synthesis* **1989**, 530.

# $^1\text{H-NMR}$ and $^{13}\text{C-NMR}$ Spectra of Selected Compounds

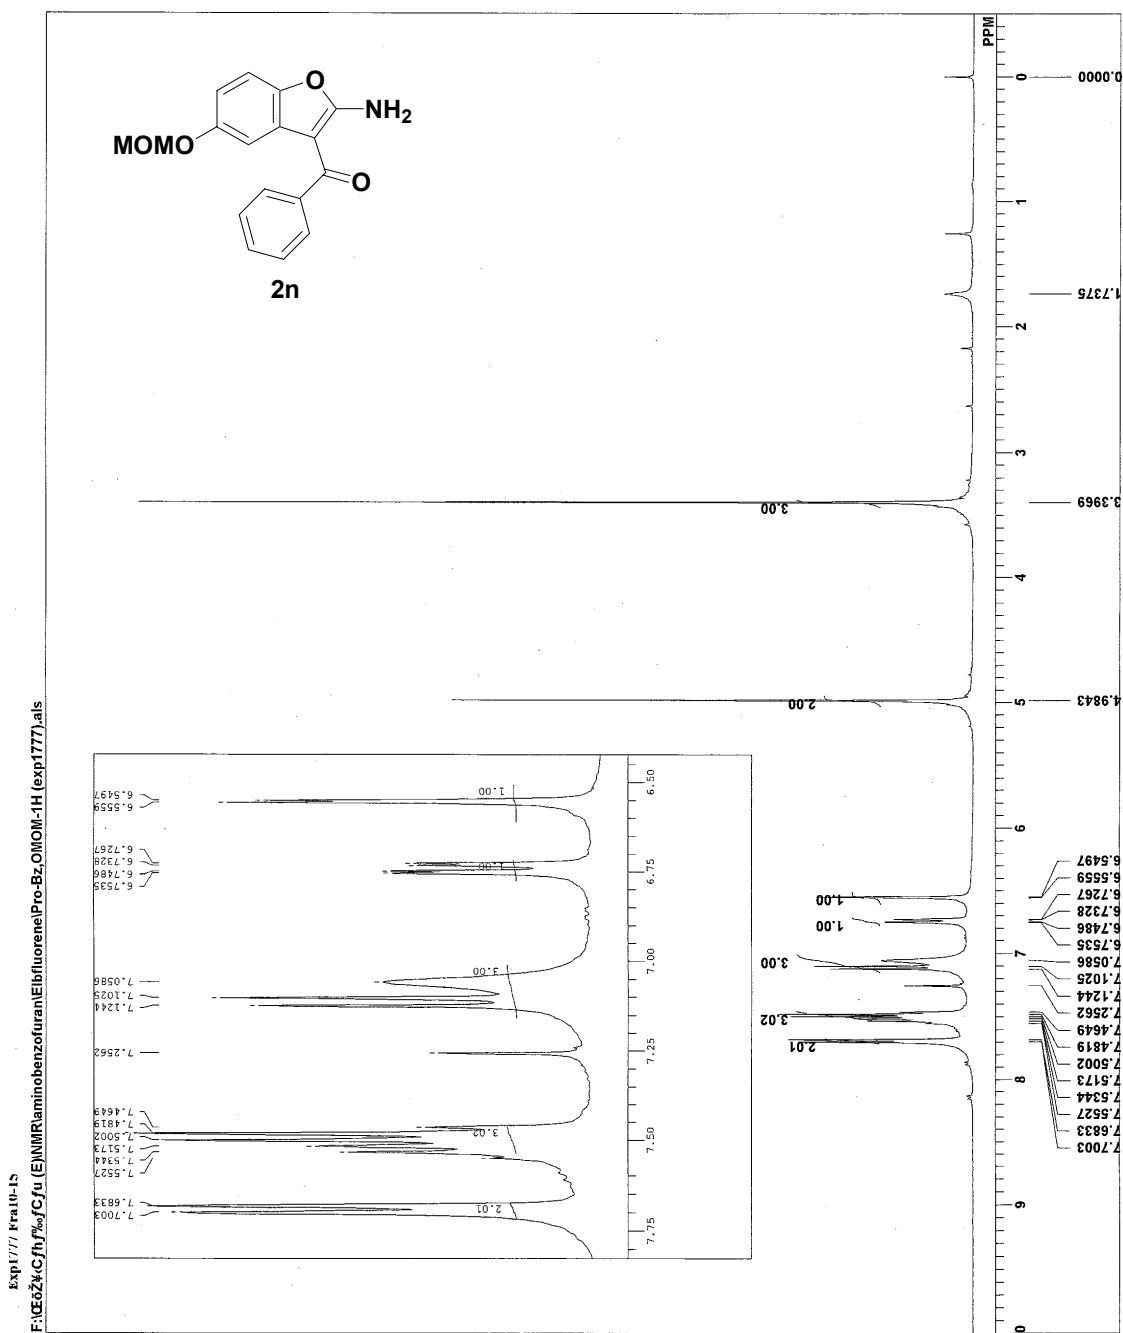

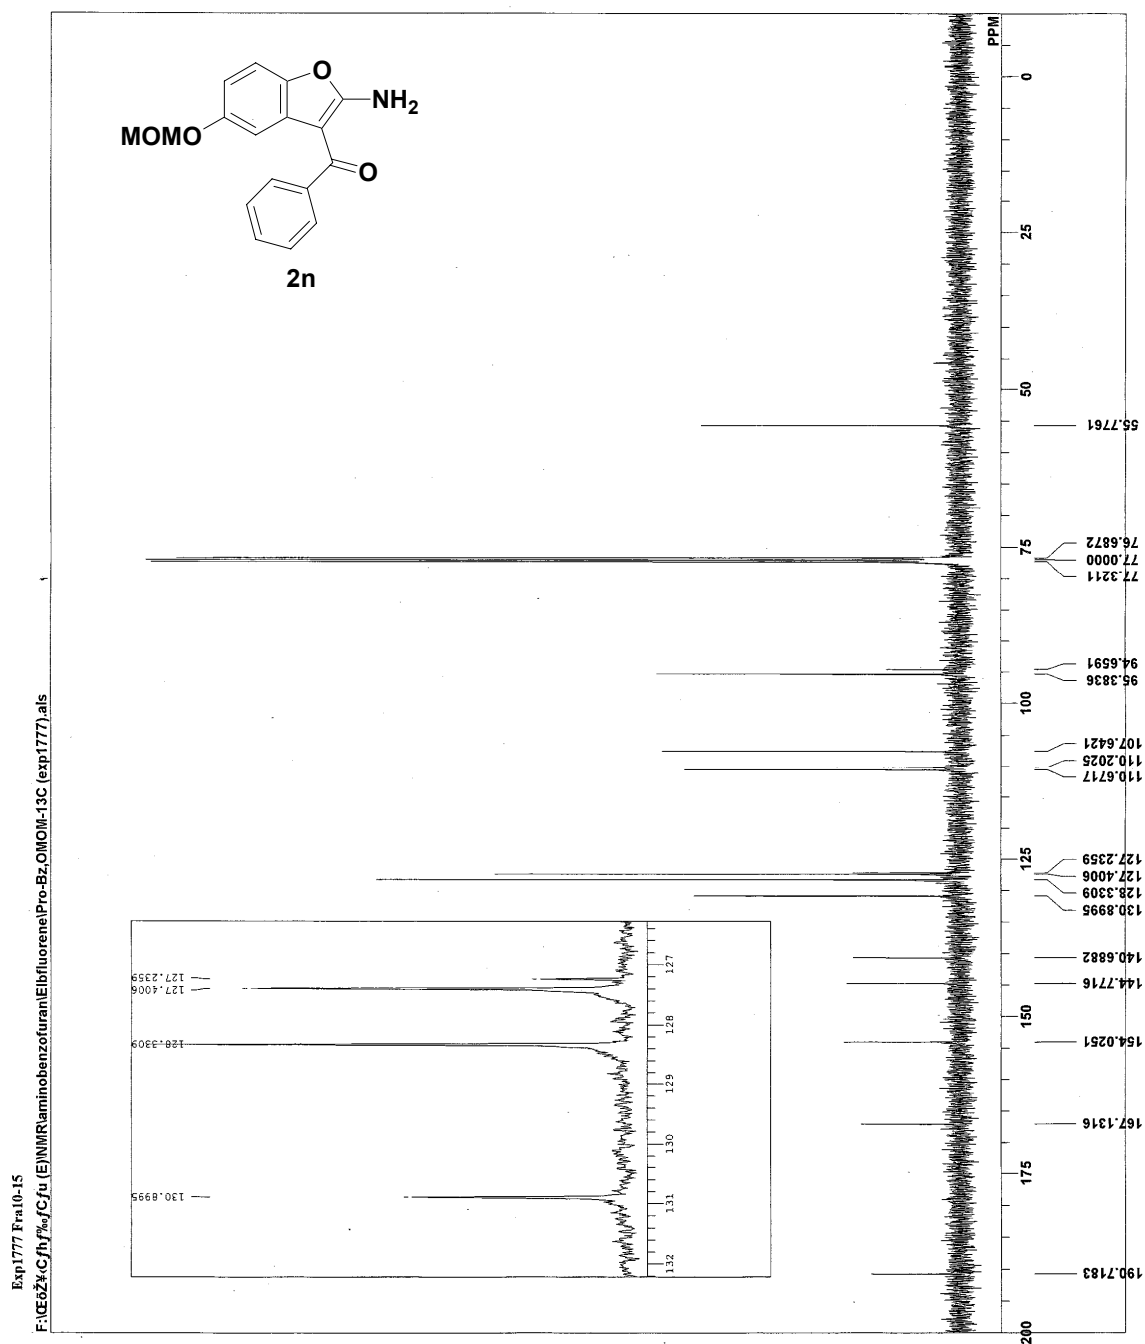



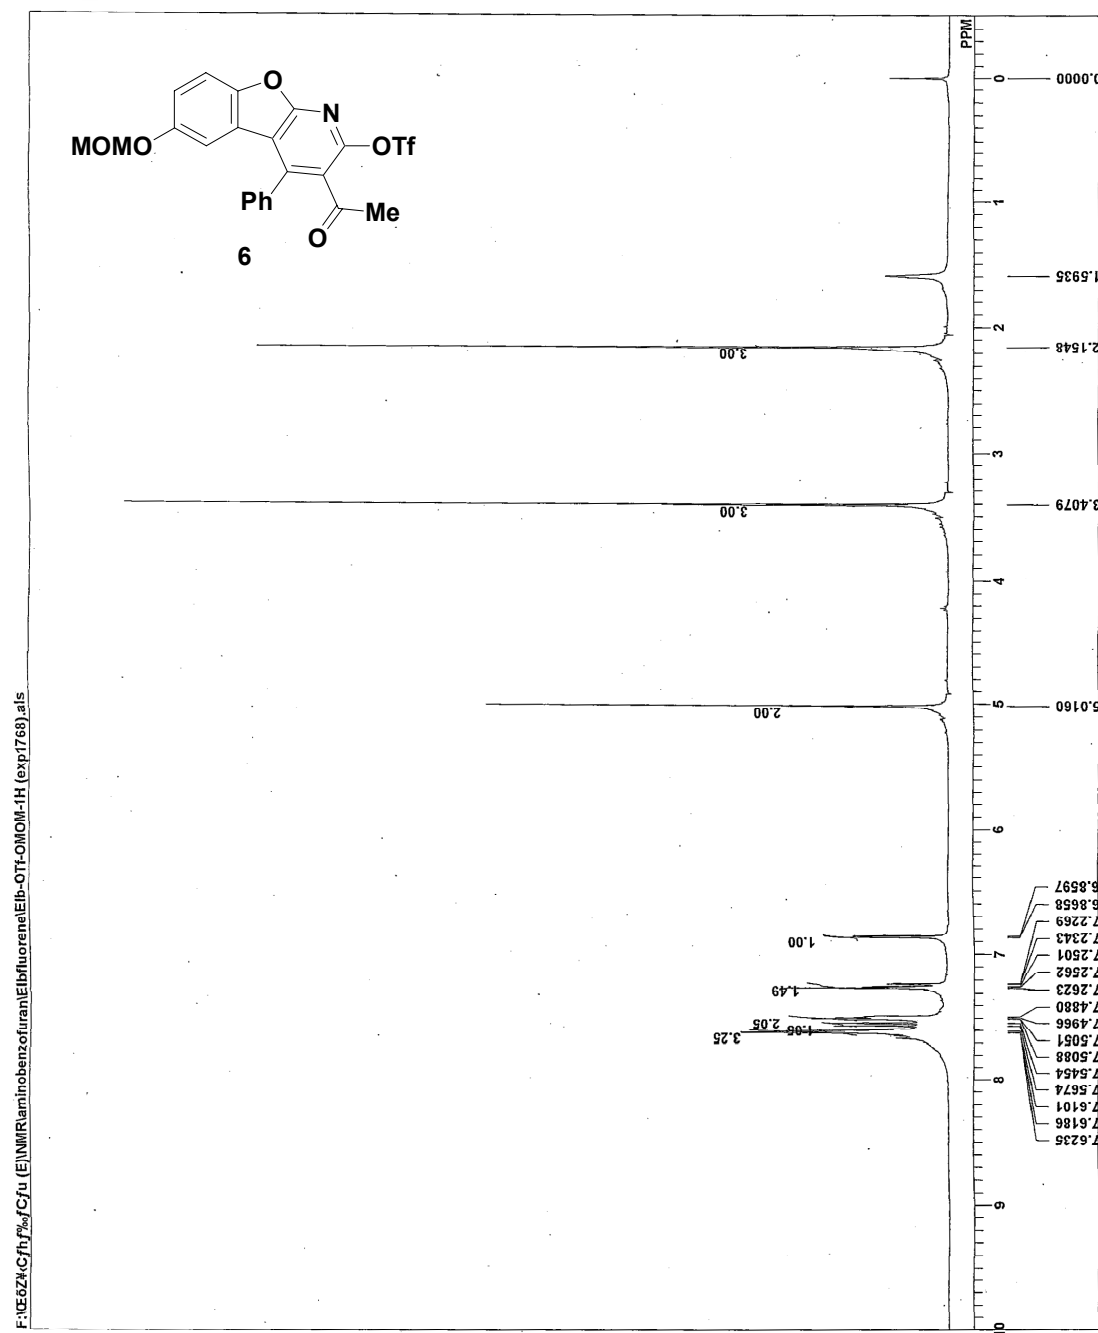

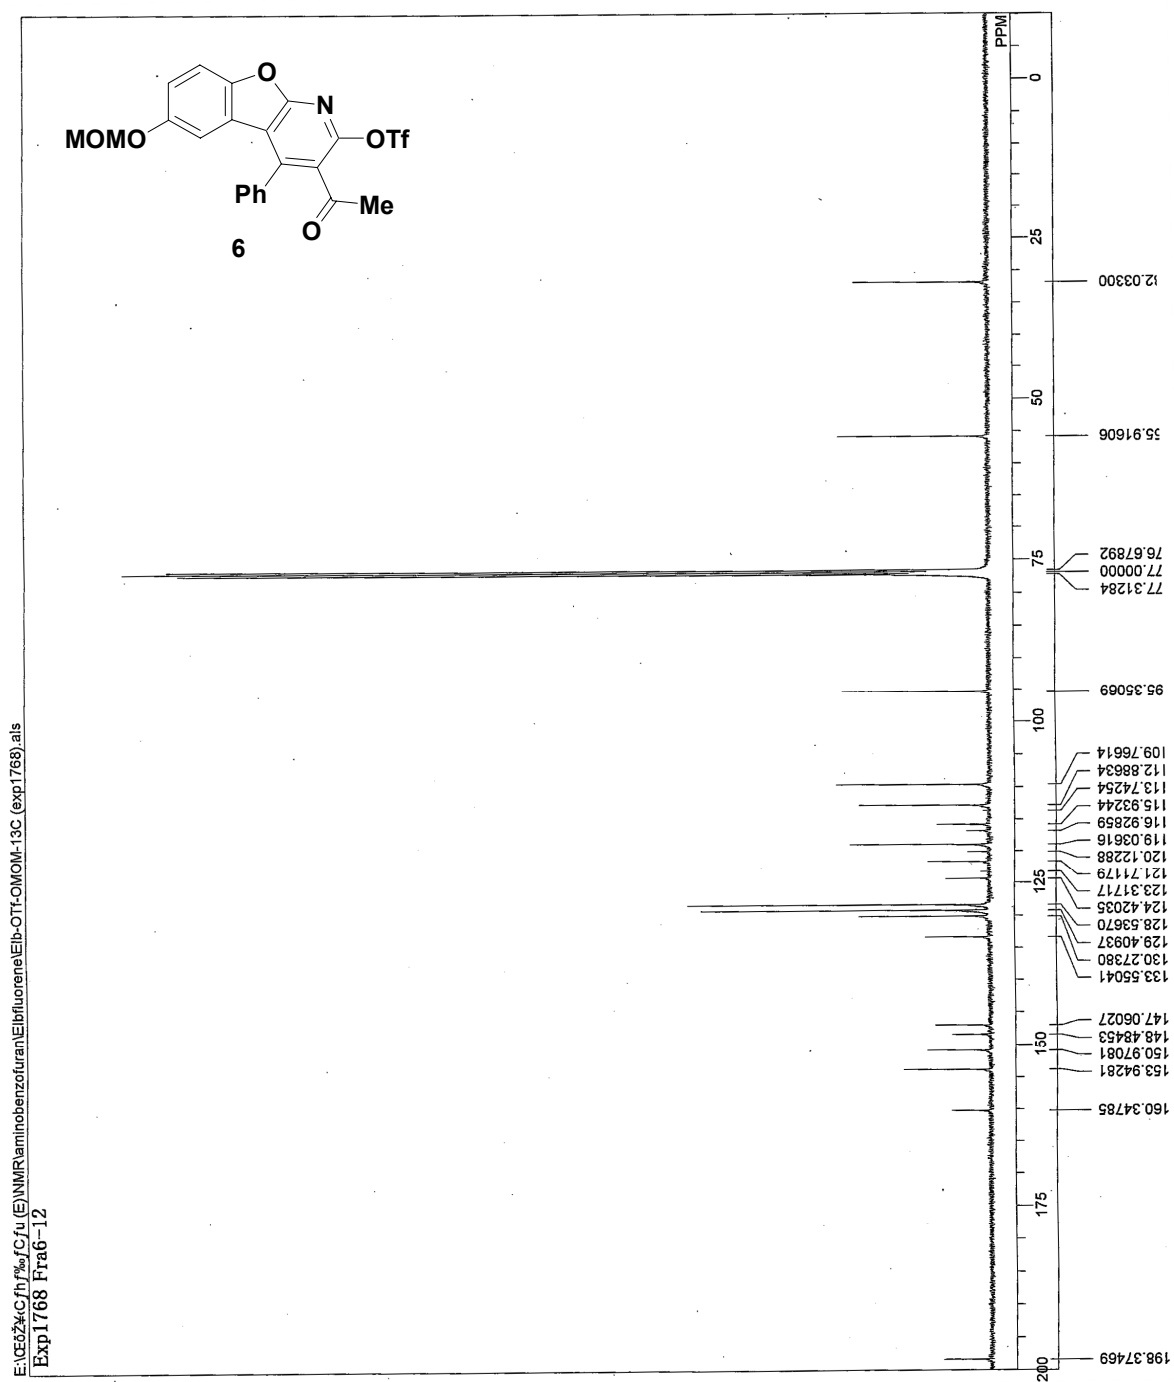

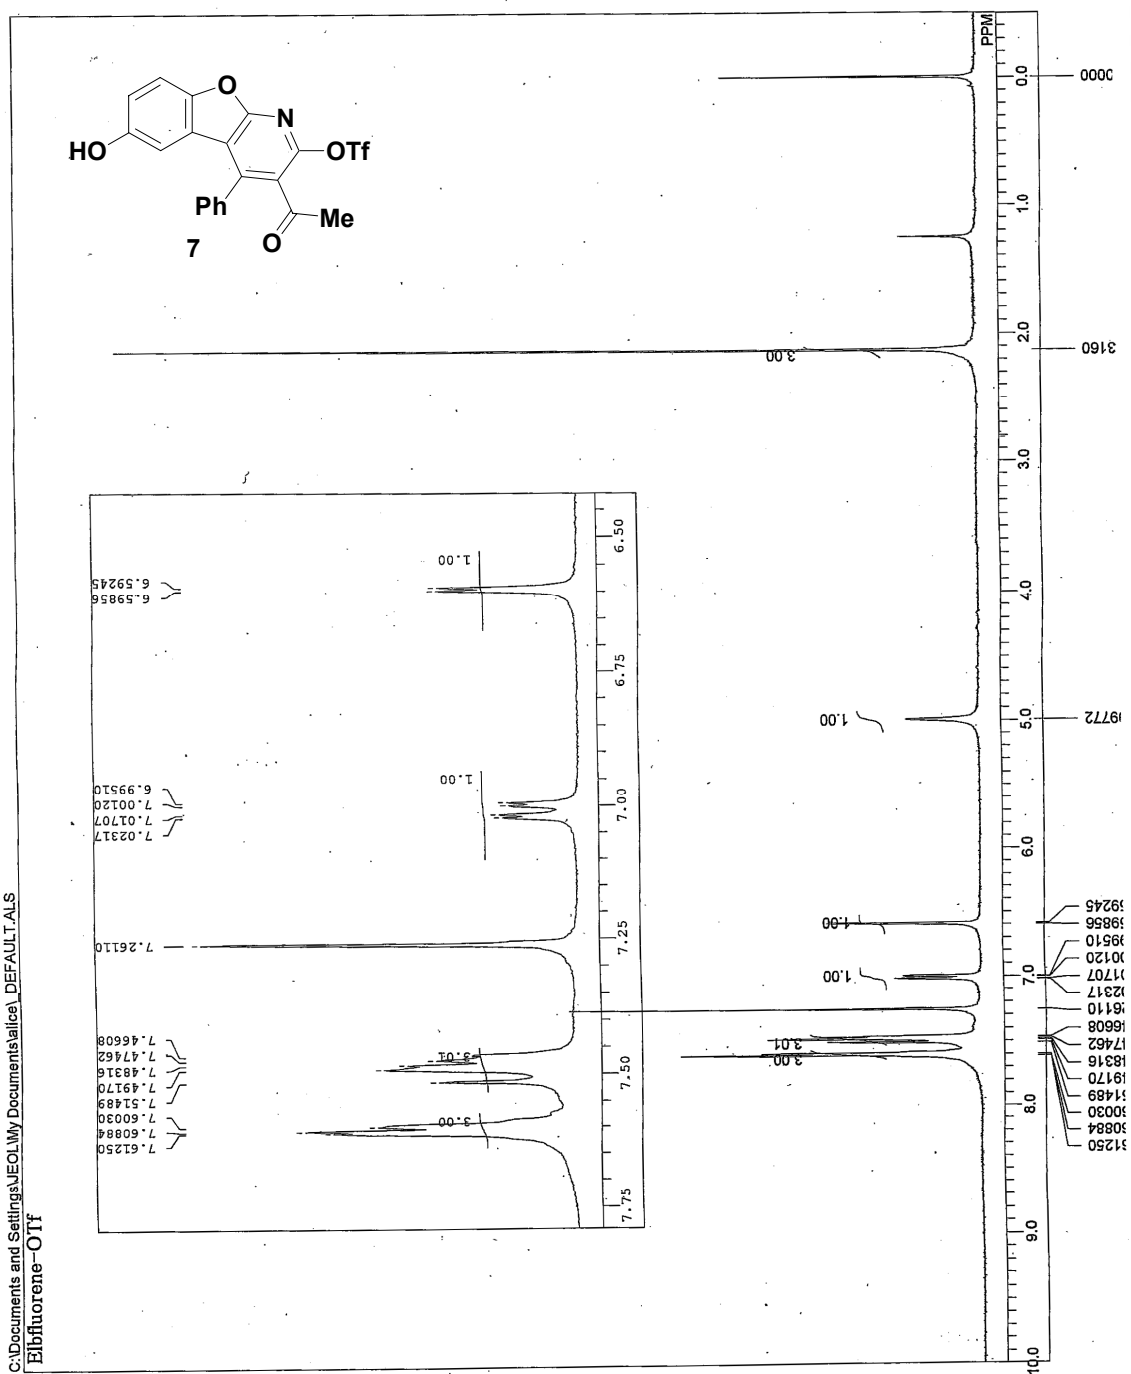



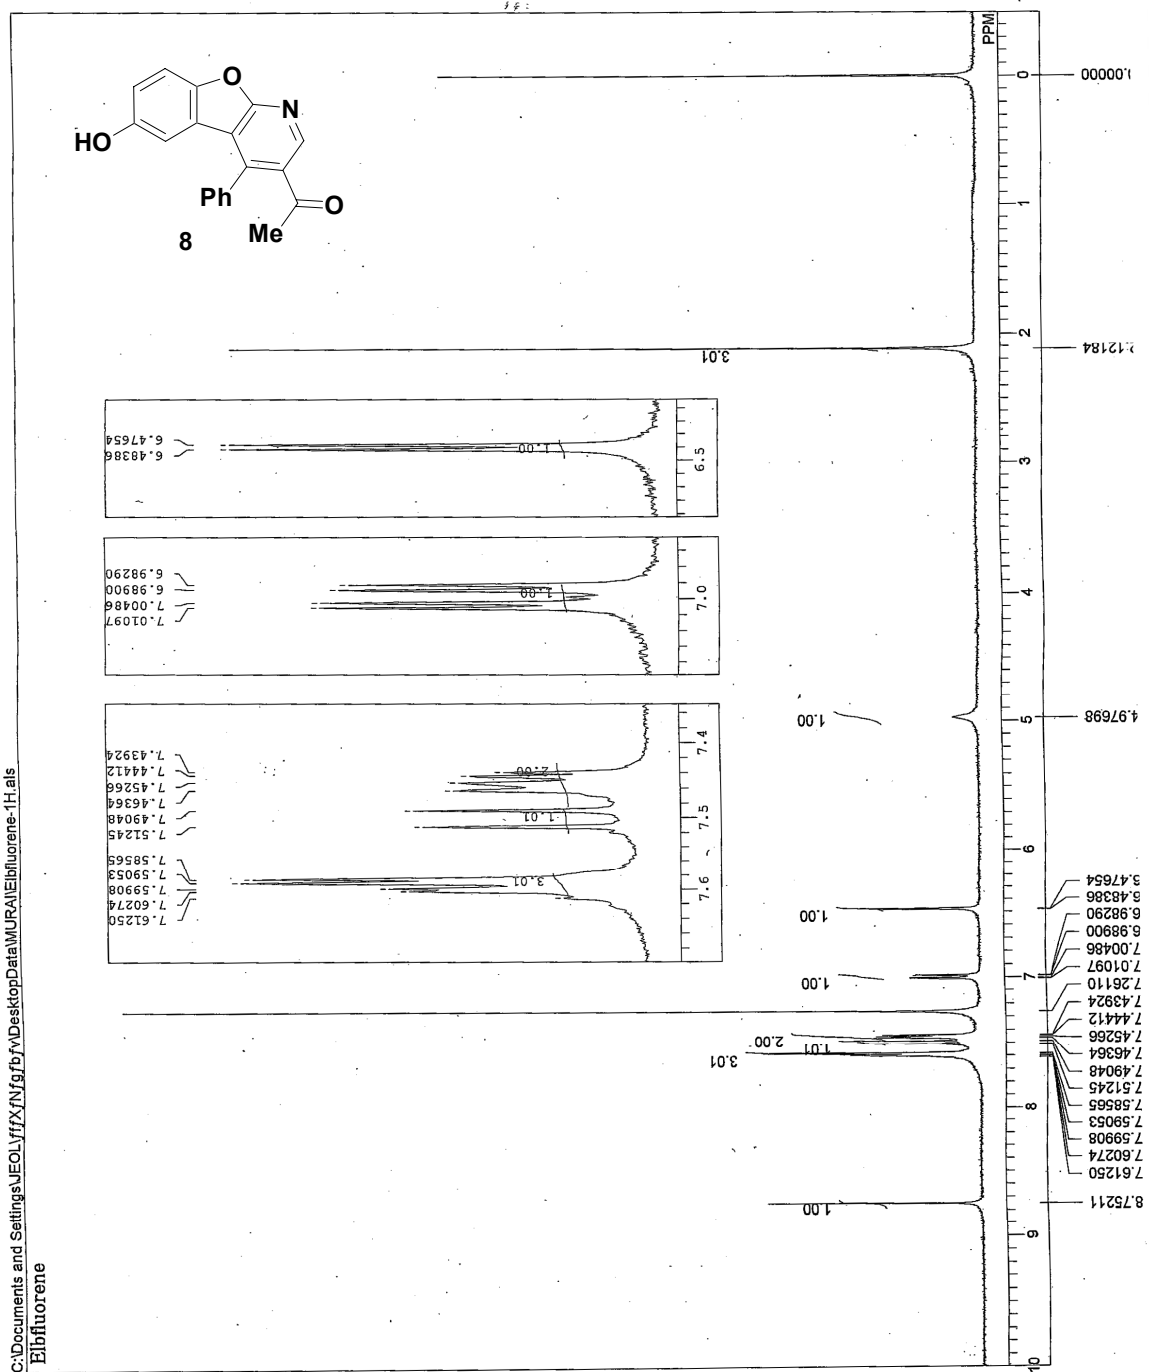



**X-ray Crystallographic Studies of 2a.** Yellow crystals of **2a** suitable for X-ray analysis were obtained by recrystallization from  $\text{CHCl}_3/n$ -hexane. The single crystal was sealed in a Pyrex glass capillary under  $\text{N}_2$  atmosphere and used for data collection. All measurements were made on a Rigaku RAXIS imaging plate area detector with graphite monochromated  $\text{Mo-K}\alpha$  radiation. Details of crystal and data collection parameters are summarized in Table 3. The positions of non-hydrogen atoms were determined by direct methods (SIR92) and subsequent Fourier syntheses (DIRDIF PATTY). An ORTEP drawing of **2a** is shown in Figure 1. Although four crystallographically independent molecules and one water molecule were included in each unit cell, only one independent molecule is shown for clarity. Thermal ellipsoids are displayed at the 50% probability level. The position of oxygen atom of water and some of the fluorine atoms of the trifluoromethyl groups had disorders. Because size and quality of the crystal was not enough, the data completeness was less than 85%. Although we tried to get another better crystal, we could not. However, the reflection parameter ratio was more than 10, and we believe that we could get sufficient reflection to just confirm the structure of the product.

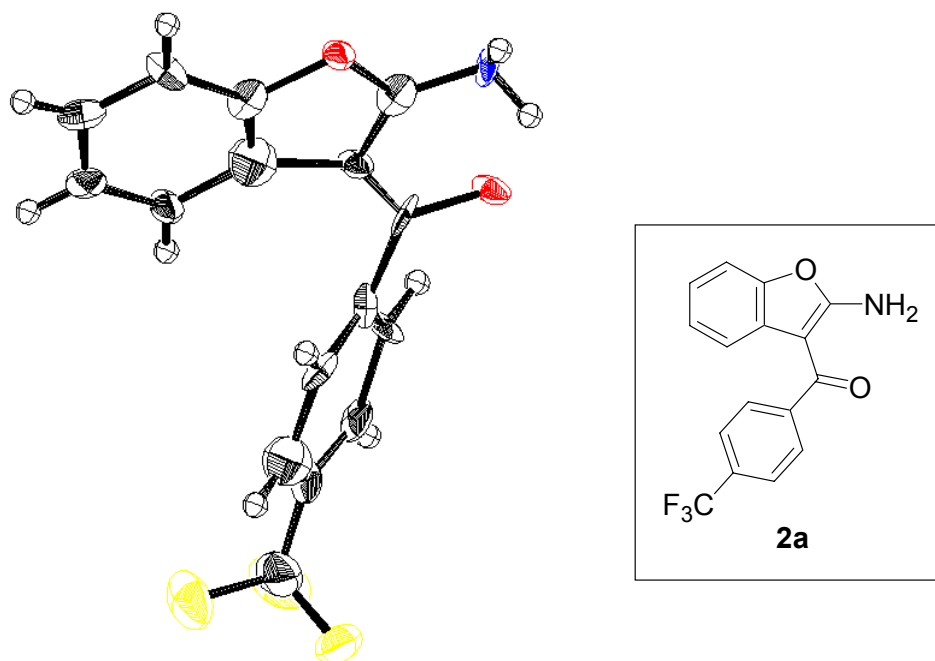

**Figure 1.** ORTEP drawing of **2a**.

**Table 3.** Summary of Crystallographic Data of **2a**

---

Empirical Formula: C<sub>16</sub>H<sub>10</sub>F<sub>3</sub>NO<sub>2</sub>  
Formula weight: 305.26  
Crystal system: monoclinic  
Space group: P21/n (#14)  
Crystal Color: yellow  
lattice parameters:  
 $a$  (Å) = 9.129(6),  $b$  (Å) = 29.139(19),  $c$  (Å) = 20.733(14),  
 $V$  (Å<sup>3</sup>) = 5494(6),  $\alpha = \beta = 90^\circ$ ,  $\gamma = 95.000(3)^\circ$ ,  
 $Z = 16$   
 $D_{\text{calc}}$  (g cm<sup>-3</sup>): 1.476  
 $\mu$  (Mo K $\alpha$ ) (cm<sup>-1</sup>): 1.249  
goodness of fit (GOF) = 1.001.  
 $F(000)$  632  
Diffractometer: Rigaku RAXIS-RAPID  
Radiation: MoK $\alpha$  ( $\lambda = 0.71070\text{\AA}$ ), Graphite Monochromated  
Temp (°C): 23.0  
Scan Type:  $\omega$  .2 $\theta$   
Max. 2 $\theta$  (°): 55.0  
No. of Reflections Measured total: 21191  
No. of observns ( $I > 3.00\sigma(I)$ ): 9597  
Structure Solution: Direct Methods (SIR92)  
Refinement: Full-Matrix Least-Squares on F  
no. of variables: 829  
reflection/parameter ratio: 11.58  
residuals:  $R = 0.0786$ ,  $R_{\text{int}} = 0.059$ ,  $R_w = 0.1390$   
goodness of fit (GOF): 1.001  
Max Shift/Error in Final Cycle: 0.00  
Maximum peak in Final Diff Map (e Å<sup>-3</sup>): 1.39  
Maximum peak in Final Diff Map (e Å<sup>-3</sup>): -1.44

---
